# Supplementary material
Source: publisher site journal article supplement (https://www.dovepress.com/article/326213)
Supplement: Supplementary file 1 [file get_supplementary_file.php]

## Online Supplement

### Online Supplement 1: Definition of demographic and clinical outcomes in the OPCR

| Variable               | Description                                                                                                                                                                                                                                                                                                                                                                                                                                                                                        | Ascertainment Period                               |
|------------------------|----------------------------------------------------------------------------------------------------------------------------------------------------------------------------------------------------------------------------------------------------------------------------------------------------------------------------------------------------------------------------------------------------------------------------------------------------------------------------------------------------|----------------------------------------------------|
| <b>Exposures</b>       |                                                                                                                                                                                                                                                                                                                                                                                                                                                                                                    |                                                    |
| Socioeconomic Status   | Assessed using quintiles of the 2011 Indices of Multiple Deprivation based on the location of the patient's general practice.                                                                                                                                                                                                                                                                                                                                                                      | N/A                                                |
| <b>Outcomes</b>        |                                                                                                                                                                                                                                                                                                                                                                                                                                                                                                    |                                                    |
| Asthma Exacerbation    | Read code indicating an 'Asthma Exacerbation' or 'Asthma Attack, prescription of acute oral corticosteroids (OCS), or a lower respiratory infection requiring antibiotics. We applied an algorithm based on number of days medication given, strength of tablet, diagnosis codes recorded during the prescribing visit, dosing instruction and frequency of OCS prescription to differentiate maintenance and acute OCS use. OCS prescribed during annual asthma reviews were excluded.            | 1 year from start of FUP                           |
| Asthma Review          | Read code list recognised within the NHS Quality and Outcomes Framework: Asthma annual review (Read code: Xaleq), Asthma follow-up (Xaler), Asthma monitoring by nurse (Xalu5), Asthma monitoring by doctor (Xalu6), Asthma medication review (Xalfk) or Asthma monitoring check done (XE2Nb).                                                                                                                                                                                                     | 1 year from start of FUP                           |
| Blood Eosinophil Count | Blood eosinophil count measured in cells per litre ( $10^9/L$ ).                                                                                                                                                                                                                                                                                                                                                                                                                                   | 1 year from start of FUP Last measurement recorded |
| Peak Flow              | Percent predicted values were calculated using raw measurements and the formula specified by Knudson et al. <sup>28</sup> We used a percent predicted peak flow value recorded directly in the medical records when no raw peak flow measure was available, or when the patient's height was unavailable.                                                                                                                                                                                          | 1 year from start of FUP                           |
| Respiratory Referral   | Patient has been reviewed by, or received a referral to, a respiratory specialist using a list of Read codes employed previously. <sup>29</sup>                                                                                                                                                                                                                                                                                                                                                    | 1 year from start of FUP                           |
| Treatment Adherence    | Assessed using the fixed medications possession ratio of inhaled corticosteroids during the exposure period. Good adherence was defined as an MPR of greater than or equal to 70%. Medication quantity and dosing instructions were imputed using the most common for that medication (by Read Code) when insufficient information was recorded in the primary care record. When the patient received more than one type of ICS prescription, we averaged the MPR across all relevant medications. | 1 year from start of FUP                           |
| Uncontrolled Disease   | Measured using the Royal College of Physicians 3 questions <sup>30</sup> . Patients were classified as having poor control if 2 or 3 of the measures denote poor control                                                                                                                                                                                                                                                                                                                           | 1 year from start of FUP                           |

or if patients experience difficulty sleeping because of their asthma symptoms.

| <b>Covariates</b>   |                                                                                                                                                                                                                                                                                                                                                                                                                                            |                                             |
|---------------------|--------------------------------------------------------------------------------------------------------------------------------------------------------------------------------------------------------------------------------------------------------------------------------------------------------------------------------------------------------------------------------------------------------------------------------------------|---------------------------------------------|
| Alcohol Consumption | Using Read Codes and measured as units per week.                                                                                                                                                                                                                                                                                                                                                                                           | Last record before start of FUP             |
| Atopic Asthma       | Record of hay fever or eczema. <sup>57</sup>                                                                                                                                                                                                                                                                                                                                                                                               | Beginning of medical record to start of FUP |
| Body Mass Index     | Using Read Codes and measured in kg/m <sup>2</sup> .                                                                                                                                                                                                                                                                                                                                                                                       | Last record before start of FUP             |
| Comorbidities       | A large list of comorbidities were extracted including those comprising Charleston comorbidity score <sup>31</sup> , depression <sup>32</sup> , and those related to corticosteroid morbidity. <sup>33</sup> Comorbidities with low prevalence (e.g. AIDs) were excluded and some categories were combined (e.g. mild/moderate liver disease was combined with severe liver disease to form a single category).                            | 3 years before start of FUP                 |
| Ethnicity           | Using Read codes which were assigned to UK census categories using code-lists employed elsewhere. <sup>58</sup> In subgroup analysis ethnicity was dichotomised into White and Ethnic Minority Groups (comprising Asian, Black, Mixed, Other)                                                                                                                                                                                              | Entire Medical Record                       |
| Sex                 | Reported by the general practice for all patients                                                                                                                                                                                                                                                                                                                                                                                          | N/A                                         |
| Smoking Status      | Using Read Codes and categorised as Non-smoker, Current smoker, Ex-smoker.                                                                                                                                                                                                                                                                                                                                                                 | Last record before start of FUP             |
| Treatment Step      | Asthma medications were identified using Read/SNOMED hierarchies, and patients were categorised according to GINA 2018 treatment step. <sup>34</sup> Combination therapies (e.g. ICS/LABA, ICS/LABA/LAMA) were broken into their constituent parts and ICS dose was converted to a BDP equivalent. <sup>35</sup> Step five was defined as more than 6 prescriptions of OCS in a year, spanning across at least two quarters. <sup>36</sup> | 1 year before start of FUP                  |
| Year of birth       | Reported by the general practice for all patients                                                                                                                                                                                                                                                                                                                                                                                          | N/A                                         |

**Online Supplement 2: Summary of asthma treatments by GINA (2018) Step<sup>a</sup>**

| <b>GINA (2018) treatment step</b> | <b>Asthma treatment</b>                                                                                                                                                                                                                      |
|-----------------------------------|----------------------------------------------------------------------------------------------------------------------------------------------------------------------------------------------------------------------------------------------|
| <b>Step 1</b>                     | only $\beta$ -muscarinic antagonist OR<br>only muscarinic agonist                                                                                                                                                                            |
| <b>Step 2</b>                     | Low dose ICS without other controllers OR<br>LTRA without other controllers OR<br>Low dose theophylline all without other controllers                                                                                                        |
| <b>Step 3</b>                     | Medium or high dose ICS without other controllers OR<br>Low dose ICS/LABA OR<br>Low dose ICS/LAMA OR<br>Low dose ICS (without LABA/LAMA) and/or theophylline OR<br>LABA and/or LAMA (without ICS) OR<br>LTRA plus theophylline (without ICS) |
| <b>Step 4</b>                     | Medium or high dose ICS/LABA OR<br>Medium or high dose ICS/LAMA OR<br>Medium or high dose ICS plus LTRA and/or theophylline OR<br>$\geq 3$ controllers (without ICS)                                                                         |
| <b>Step 5</b>                     | Maintenance OCS plus any other asthma treatment                                                                                                                                                                                              |

<sup>a</sup>ICS: inhaled corticosteroid; LABA: long-acting  $\beta 2$ -agonist; LAMA: long-acting muscarinic antagonist; LTRA: leukotriene receptor antagonist; OCS: oral corticosteroid. Low Dose ICS:  $\leq 500\mu\text{g}$  Beclomethasone dipropionate [BDP] equivalent, Medium Dose ICS: 501-1000 BDP equivalent, High Dose ICS:  $>1000$  BDP equivalent.

Data from Global Initiative for Asthma. Global Strategy for Asthma Management and Prevention, Updated; 2018.<sup>34</sup>

Online Supplement 3: Treatment step (GINA 2018) by indices of multiple deprivation quintile

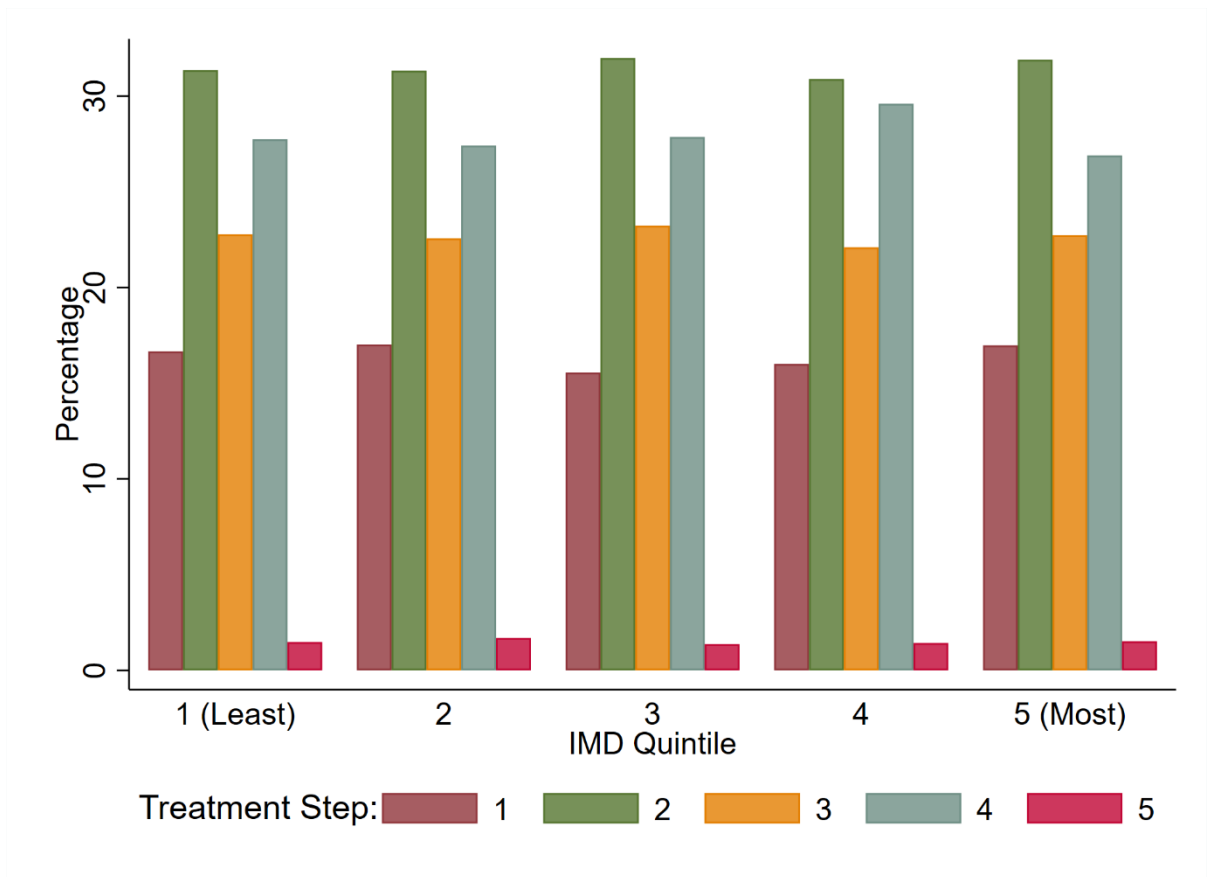

**Online Supplement 4: Proportion of patients with complete data for variables included within the analysis**

| Variable               | Overall (N [%])  | IMD Quintile (N [%]) |                 |                 |                 |                   |
|------------------------|------------------|----------------------|-----------------|-----------------|-----------------|-------------------|
|                        |                  | 5 (Least Deprived)   | 4               | 3               | 2               | 1 (Most Deprived) |
| <b>Exposures</b>       |                  |                      |                 |                 |                 |                   |
| Socioeconomic Status   | 127,040 (100.0%) | 28,215 (100.0%)      | 26,900 (100.0%) | 24,332 (100.0%) | 31,059 (100.0%) | 16,534 (100.0%)   |
| <b>Outcomes</b>        |                  |                      |                 |                 |                 |                   |
| Asthma Exacerbations   | 127,040 (100.0%) | 28,215 (100.0%)      | 26,900 (100.0%) | 24,332 (100.0%) | 31,059 (100.0%) | 16,534 (100.0%)   |
| Asthma Review          | 127,040 (100.0%) | 28,215 (100.0%)      | 26,900 (100.0%) | 24,332 (100.0%) | 31,059 (100.0%) | 16,534 (100.0%)   |
| Blood Eosinophil Count | 45,761 (36.0%)   | 9,991 (35.4%)        | 9,530 (35.4%)   | 8,571 (35.2%)   | 11,175 (36.0%)  | 6,494 (39.3%)     |
| Peak Flow              | 71,291 (56.1%)   | 15,227 (54.0%)       | 15,446 (57.4%)  | 13,655 (56.1%)  | 18,003 (58.0%)  | 8,960 (54.2%)     |
| Respiratory Referral   | 127,040 (100.0%) | 28,215 (100.0%)      | 26,900 (100.0%) | 24,332 (100.0%) | 31,059 (100.0%) | 16,534 (100.0%)   |
| Treatment Adherence    | 102,712 (80.9%)  | 23,107 (81.9%)       | 21,697 (80.7%)  | 19,660 (80.8%)  | 25,026 (80.6%)  | 13,222 (80.0%)    |
| Uncontrolled Disease   | 40,078 (31.5%)   | 9,345 (33.1%)        | 8,471 (31.5%)   | 7,221 (29.7%)   | 10,299 (33.2%)  | 4,742 (28.7%)     |
| <b>Covariates</b>      |                  |                      |                 |                 |                 |                   |
| Alcohol Consumption    | 69,202 (54.5%)   | 14,739 (52.2%)       | 14,542 (54.1%)  | 13,237 (54.4%)  | 18,178 (58.5%)  | 8,506 (51.4%)     |
| Atopic Asthma          | 127,040 (100.0%) | 28,215 (100.0%)      | 26,900 (100.0%) | 24,332 (100.0%) | 31,059 (100.0%) | 16,534 (100.0%)   |
| Body Mass Index        | 102,386 (80.6%)  | 21,533 (76.3%)       | 21,486 (79.9%)  | 19,154 (78.7%)  | 26,096 (84.0%)  | 14,117 (85.4%)    |
| Comorbidities          | 127,040 (100.0%) | 28,215 (100.0%)      | 26,900 (100.0%) | 24,332 (100.0%) | 31,059 (100.0%) | 16,534 (100.0%)   |
| Ethnicity              | 85,616 (67.4%)   | 18,744 (66.4%)       | 17,918 (66.6%)  | 16,396 (67.4%)  | 21,533 (69.3%)  | 11,025 (66.7%)    |
| Sex                    | 127,040 (100.0%) | 28,215 (100.0%)      | 26,900 (100.0%) | 24,332 (100.0%) | 31,059 (100.0%) | 16,534 (100.0%)   |
| Smoking Status         | 122,527 (96.4%)  | 27,681 (98.1%)       | 26,150 (97.2%)  | 22,698 (93.3%)  | 30,390 (97.8%)  | 15,608 (94.4%)    |
| Treatment Step         | 103,518 (81.5%)  | 23,138 (82.0%)       | 21,770 (80.9%)  | 19,966 (82.1%)  | 25,400 (81.8%)  | 13,244 (80.1%)    |
| Year of Birth          | 127,040 (100.0%) | 28,215 (100.0%)      | 26,900 (100.0%) | 24,332 (100.0%) | 31,059 (100.0%) | 16,534 (100.0%)   |

**Online Supplement 5: Comparison of demographic and clinical information by indices of multiple deprivation restricted to patients from ethnic minority groups**

|                                           | <b>5 (Least Deprived)</b> | <b>4</b>      | <b>3</b>      | <b>2</b>      | <b>1 (Most Deprived)</b> | <b>P-value</b> |
|-------------------------------------------|---------------------------|---------------|---------------|---------------|--------------------------|----------------|
| <b>Number Patients</b>                    | 476                       | 958           | 619           | 1,016         | 1,288                    |                |
| <b>Age (years)</b>                        | 49.8 (16.2)               | 46.1 (15.2)   | 46.4 (16.4)   | 48.9 (17.1)   | 47.8 (16.1)              | <0.001         |
| <35                                       | 93 (19.5%)                | 246 (25.7%)   | 176 (28.4%)   | 241 (23.7%)   | 314 (24.4%)              |                |
| 35-54                                     | 215 (45.2%)               | 466 (48.6%)   | 254 (41.0%)   | 416 (40.9%)   | 567 (44.0%)              |                |
| 55-74                                     | 132 (27.7%)               | 200 (20.9%)   | 152 (24.6%)   | 273 (26.9%)   | 312 (24.2%)              |                |
| 75+                                       | 36 (7.6%)                 | 46 (4.8%)     | 37 (6.0%)     | 86 (8.5%)     | 95 (7.4%)                |                |
| <b>Sex</b>                                |                           |               |               |               |                          | 0.739          |
| Female                                    | 269 (56.5%)               | 547 (57.1%)   | 346 (55.9%)   | 584 (57.5%)   | 759 (58.9%)              |                |
| Male                                      | 207 (43.5%)               | 411 (42.9%)   | 273 (44.1%)   | 432 (42.5%)   | 529 (41.1%)              |                |
| <b>Ethnicity</b>                          |                           |               |               |               |                          | <0.001         |
| Asian                                     | 304 (63.9%)               | 710 (74.1%)   | 449 (72.5%)   | 769 (75.7%)   | 933 (72.4%)              |                |
| Black                                     | 45 (9.5%)                 | 104 (10.9%)   | 61 (9.9%)     | 143 (14.1%)   | 185 (14.4%)              |                |
| Mixed                                     | 48 (10.1%)                | 78 (8.1%)     | 59 (9.5%)     | 57 (5.6%)     | 55 (4.3%)                |                |
| Other                                     | 79 (16.6%)                | 66 (6.9%)     | 50 (8.1%)     | 47 (4.6%)     | 115 (8.9%)               |                |
| <b>BMI (kg/m<sup>2</sup>)</b>             | 27.7 (5.7)                | 27.3 (5.7)    | 27.5 (5.6)    | 28.2 (5.8)    | 28.7 (6.0)               | <0.001         |
| <b>Alcohol Consumption (Weekly Units)</b> | 1.0 (0.0,5.0)             | 0.0 (0.0,2.0) | 0.0 (0.0,2.0) | 0.0 (0.0,0.0) | 0.0 (0.0,0.0)            | <0.001         |
| <b>Smoking Status</b>                     |                           |               |               |               |                          | 0.114          |
| Never-Smoker                              | 356 (75.3%)               | 738 (77.8%)   | 443 (74.3%)   | 757 (74.9%)   | 967 (75.3%)              |                |
| Ex-Smoker                                 | 79 (16.7%)                | 115 (12.1%)   | 83 (13.9%)    | 137 (13.6%)   | 162 (12.6%)              |                |
| Current Smoker                            | 38 (8.0%)                 | 96 (10.1%)    | 70 (11.7%)    | 117 (11.6%)   | 155 (12.1%)              |                |
| <b>Comorbidities</b>                      |                           |               |               |               |                          |                |
| Allergic rhinitis                         | 71 (14.9%)                | 210 (21.9%)   | 92 (14.9%)    | 184 (18.1%)   | 250 (19.4%)              | 0.001          |
| Cancer                                    | 34 (7.1%)                 | 69 (7.2%)     | 44 (7.1%)     | 73 (7.2%)     | 87 (6.8%)                | 0.993          |
| Cataract                                  | 11 (2.3%)                 | 19 (2.0%)     | 19 (3.1%)     | 35 (3.4%)     | 31 (2.4%)                | 0.279          |
| Cerebrovascular disease                   | 10 (2.1%)                 | 11 (1.1%)     | 6 (1.0%)      | 17 (1.7%)     | 23 (1.8%)                | 0.416          |
| Congestive heart disease                  | 5 (1.1%)                  | 7 (0.7%)      | 6 (1.0%)      | 10 (1.0%)     | 16 (1.2%)                | 0.832          |
| Depression/Anxiety                        | 47 (9.9%)                 | 76 (7.9%)     | 48 (7.8%)     | 116 (11.4%)   | 109 (8.5%)               | 0.033          |
| Diabetes                                  | 61 (12.8%)                | 109 (11.4%)   | 88 (14.2%)    | 191 (18.8%)   | 213 (16.5%)              | <0.001         |
| Eczema                                    | 53 (11.1%)                | 157 (16.4%)   | 79 (12.8%)    | 159 (15.6%)   | 204 (15.8%)              | 0.033          |
| Glaucoma                                  | 6 (1.3%)                  | 10 (1.0%)     | 9 (1.5%)      | 13 (1.3%)     | 17 (1.3%)                | 0.965          |
| Hypertension                              | 62 (13.0%)                | 126 (13.2%)   | 68 (11.0%)    | 154 (15.2%)   | 140 (10.9%)              | 0.023          |
| Insomnia                                  | 7 (1.5%)                  | 21 (2.2%)     | 12 (1.9%)     | 37 (3.6%)     | 40 (3.1%)                | 0.053          |

|                                             |                  |                  |                  |                  |                  |        |
|---------------------------------------------|------------------|------------------|------------------|------------------|------------------|--------|
| Liver Disease                               | 0 (0.0%)         | 0 (0.0%)         | 0 (0.0%)         | 5 (0.5%)         | 1 (0.1%)         | 0.014  |
| Myocardial infarction                       | 5 (1.1%)         | 1 (0.1%)         | 3 (0.5%)         | 6 (0.6%)         | 9 (0.7%)         | 0.181  |
| Nasal polyps                                | 7 (1.5%)         | 7 (0.7%)         | 4 (0.6%)         | 8 (0.8%)         | 15 (1.2%)        | 0.491  |
| Oral candidiasis                            | 7 (1.5%)         | 9 (0.9%)         | 13 (2.1%)        | 23 (2.3%)        | 30 (2.3%)        | 0.116  |
| Osteoporosis                                | 6 (1.3%)         | 11 (1.1%)        | 3 (0.5%)         | 13 (1.3%)        | 15 (1.2%)        | 0.621  |
| Renal disease                               | 9 (1.9%)         | 24 (2.5%)        | 12 (1.9%)        | 42 (4.1%)        | 36 (2.8%)        | 0.041  |
| Rheumatological disease                     | 6 (1.3%)         | 16 (1.7%)        | 15 (2.4%)        | 16 (1.6%)        | 22 (1.7%)        | 0.637  |
| <b>Atopic Disease</b>                       | 84 (17.6%)       | 281 (29.3%)      | 136 (22.0%)      | 237 (23.3%)      | 342 (26.6%)      | <0.001 |
| <b>ICS Dose (BDP Equivalent)</b>            | 500 (400,1000)   | 400 (400,1000)   | 500 (400,1000)   | 400 (400,1000)   | 400 (400,1000)   | <0.001 |
| <b>LTRA</b>                                 | 26 (5.5%)        | 35 (3.7%)        | 28 (4.5%)        | 66 (6.5%)        | 86 (6.7%)        | 0.013  |
| <b>SABA</b>                                 | 402 (84.5%)      | 809 (84.4%)      | 532 (85.9%)      | 816 (80.3%)      | 1,115 (86.6%)    | <0.001 |
| <b>Treatment Step (GINA 2018)</b>           |                  |                  |                  |                  |                  | <0.001 |
| 1                                           | 81 (17.0%)       | 155 (16.2%)      | 108 (17.4%)      | 151 (14.9%)      | 267 (20.7%)      |        |
| 2                                           | 143 (30.0%)      | 383 (40.0%)      | 196 (31.7%)      | 351 (34.5%)      | 435 (33.8%)      |        |
| 3                                           | 113 (23.7%)      | 209 (21.8%)      | 136 (22.0%)      | 185 (18.2%)      | 270 (21.0%)      |        |
| 4                                           | 137 (28.8%)      | 198 (20.7%)      | 174 (28.1%)      | 314 (30.9%)      | 302 (23.4%)      |        |
| 5                                           | 2 (0.4%)         | 13 (1.4%)        | 5 (0.8%)         | 15 (1.5%)        | 14 (1.1%)        |        |
| <b>Blood Eosinophils (10<sup>9</sup>/L)</b> | 0.28 (0.14,0.40) | 0.22 (0.14,0.36) | 0.27 (0.14,0.40) | 0.23 (0.12,0.40) | 0.25 (0.15,0.40) | 0.140  |
| <b>Peak Flow (%)</b>                        | 85.5 (71.1,97.4) | 83.3 (68.3,93.7) | 84.4 (69.9,95.8) | 78.5 (65.8,90.7) | 78.5 (64.3,90.0) | <0.001 |
| <b>Treatment Adherent (MPR≥70%)</b>         | 100 (25.8%)      | 158 (20.8%)      | 114 (22.9%)      | 224 (28.0%)      | 270 (28.2%)      | 0.002  |
| <b>Asthma Review</b>                        | 234 (49.2%)      | 352 (36.7%)      | 290 (46.8%)      | 485 (47.7%)      | 578 (44.9%)      | <0.001 |
| <b>Uncontrolled Disease</b>                 | 65 (40.1%)       | 125 (47.0%)      | 132 (48.0%)      | 253 (54.8%)      | 233 (54.8%)      | 0.004  |
| <b>Any Exacerbations</b>                    | 80 (16.8%)       | 214 (22.3%)      | 115 (18.6%)      | 219 (21.6%)      | 334 (25.9%)      | <0.001 |
| <b>Respiratory Referral</b>                 | 14 (2.9%)        | 29 (3.0%)        | 18 (2.9%)        | 58 (5.7%)        | 69 (5.4%)        | 0.002  |

**Online Supplement 6: Sensitivity analysis comparing most to least indices of multiple deprivation quintile<sup>a</sup>**

|                                        | Multivariable |                  |         | Multiple Imputation |         | +BMI, Smoking Adjustment |         |
|----------------------------------------|---------------|------------------|---------|---------------------|---------|--------------------------|---------|
|                                        | N             | Ratio (95% CI)   | P-value | Ratio (95% CI)      | P-value | Ratio (95% CI)           | P-value |
| Blood Eosinophils (10 <sup>9</sup> /L) | 45,761        | 1.03 (1.00,1.06) | 0.022   | 1.03 (1.01,1.05)    | 0.001   | 1.05 (1.02,1.08)         | 0.001   |
| Peak Flow (%)                          | 71,291        | 0.95 (0.94,0.97) | <0.001  | 0.95 (0.94,0.96)    | <0.001  | 0.95 (0.94,0.97)         | <0.001  |
| Treatment Adherent                     | 102,712       | 1.43 (1.17,1.76) | 0.001   | 1.43 (1.21,1.69)    | <0.001  | 1.42 (1.12,1.79)         | 0.003   |
| Asthma Review                          | 127,040       | 0.85 (0.55,1.34) | 0.491   | 0.85 (0.55,1.34)    | 0.491   | 0.79 (0.49,1.28)         | 0.337   |
| Respiratory Referral                   | 127,040       | 1.02 (0.55,1.90) | 0.947   | 1.02 (0.55,1.90)    | 0.947   | 0.87 (0.45,1.70)         | 0.694   |
| Uncontrolled Disease                   | 40,078        | 1.54 (1.16,2.05) | 0.003   | 1.54 (1.37,1.72)    | <0.001  | 1.39 (1.09,1.79)         | 0.009   |
| Any Exacerbations                      | 127,040       | 1.27 (1.13,1.42) | <0.001  | 1.27 (1.13,1.42)    | <0.001  | 1.20 (1.07,1.35)         | 0.002   |

<sup>a</sup>Adjusted for year, age (5 year groups) and sex
